# Supplementary material for: Lenalidomide and dexamethasone with or without clarithromycin in patients with multiple myeloma ineligible for autologous transplant: a randomized trial
Source: PubMed Central journal article supplement (PMC8139975; doi:10.1038/s41408-021-00490-8), 2021-05-21

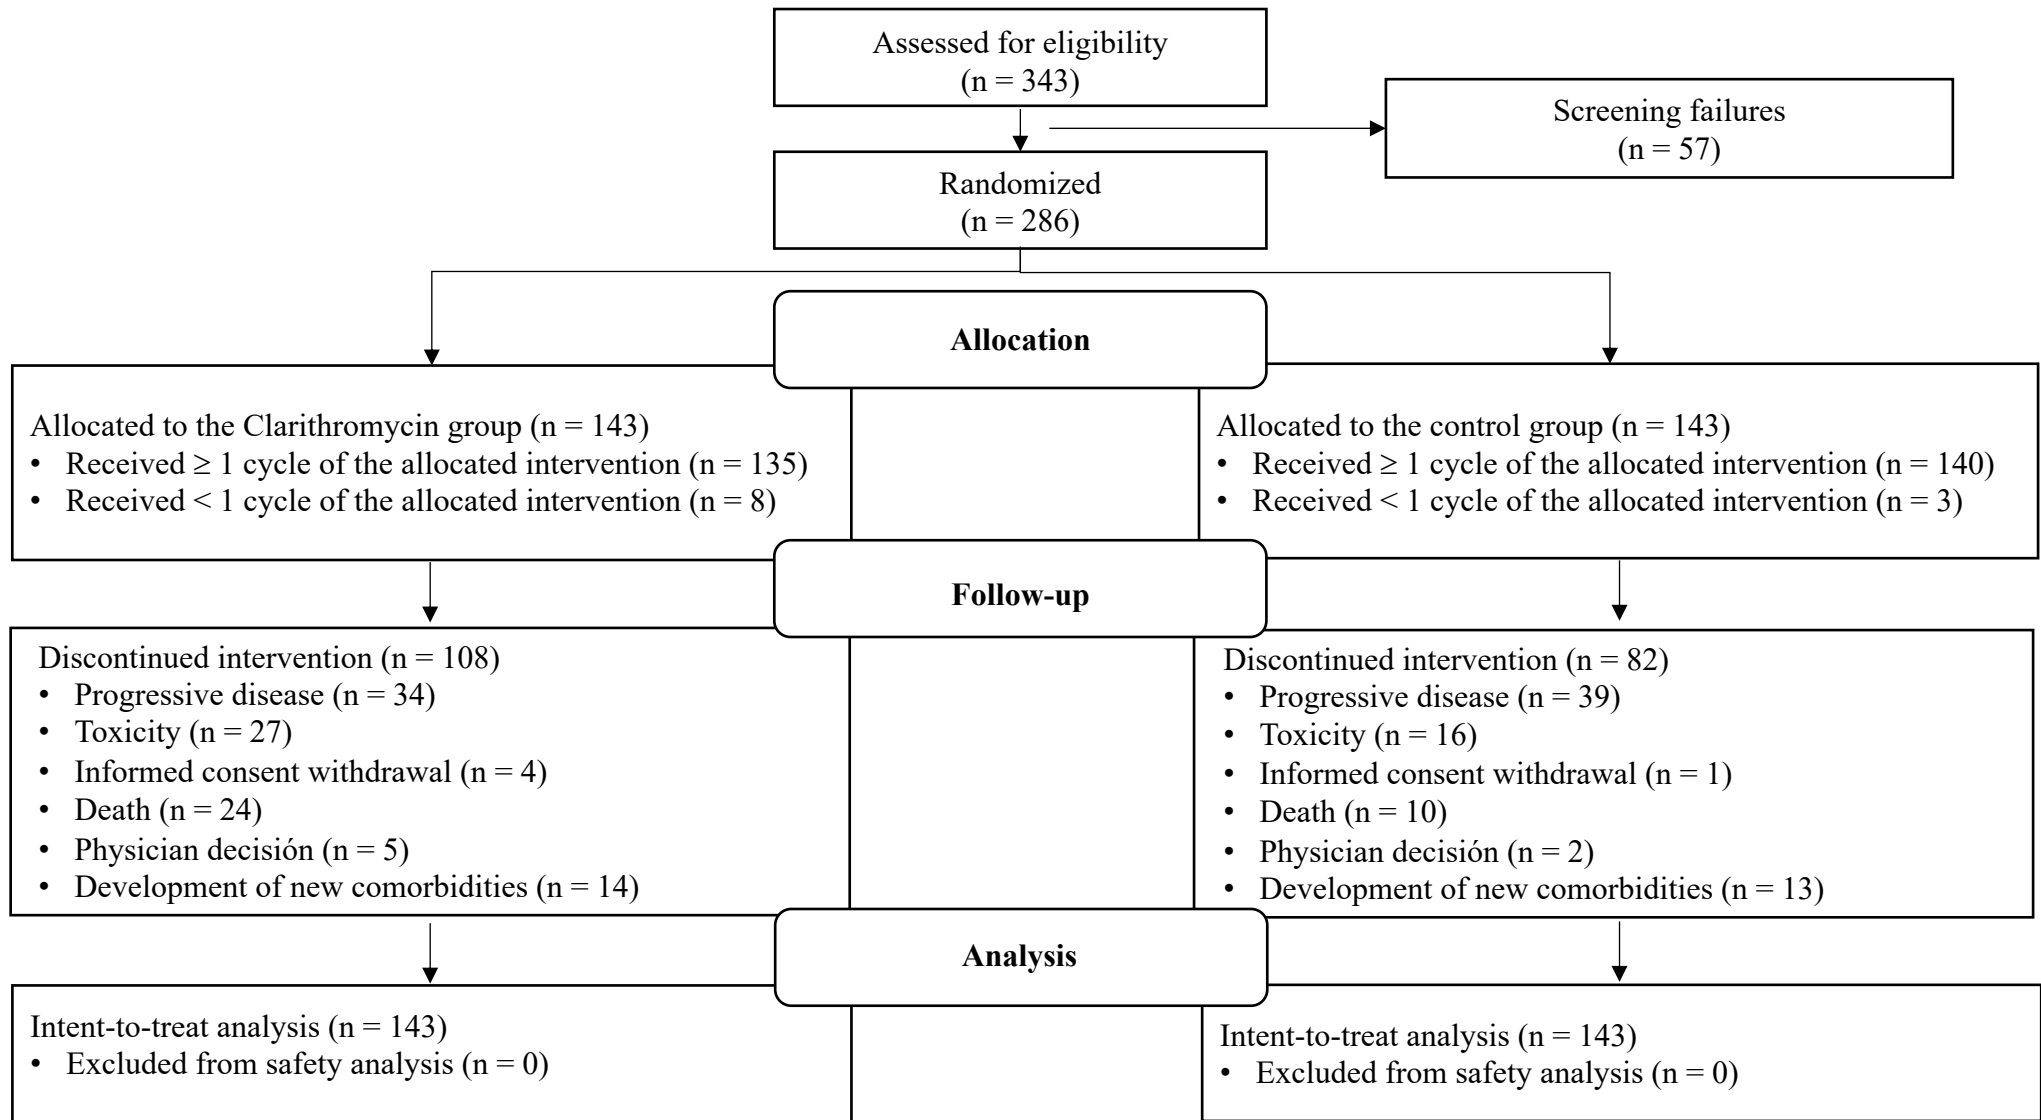

Supplement: 41408_2021_490_MOESM1_ESM.pdf [file 41408_2021_490_MOESM1_ESM.pdf]
